# Supplementary material for: Potential risk of certain cancers among patients with Periodontitis: a supplementary meta-analysis of a large-scale population
Source: PubMed Central journal article supplement (PMC7532473; doi:10.7150/ijms.46812), 2020-09-12
Supplement: ijmsv17p2531s1.pdf [file ijmsv17p2531s1.pdf]

|               | Random sequence generation (selection bias) | Allocation concealment (selection bias) | Blinding of participants and personnel (performance bias) | Blinding of outcome assessment (detection bias) | Incomplete outcome data (attrition bias) | Selective reporting (reporting bias) | Other bias |
|---------------|---------------------------------------------|-----------------------------------------|-----------------------------------------------------------|-------------------------------------------------|------------------------------------------|--------------------------------------|------------|
| Ahn 2012      | ●                                           | +                                       | +                                                         | +                                               | +                                        | +                                    | +          |
| Arora 2010    | +                                           | +                                       | +                                                         | +                                               | +                                        | +                                    | ●          |
| Chung 2016    | +                                           | +                                       | +                                                         | +                                               | +                                        | +                                    | +          |
| Guyen 2019    | +                                           | ?                                       | +                                                         | +                                               | ?                                        | +                                    | +          |
| Heikkila 2018 | +                                           | ?                                       | +                                                         | +                                               | +                                        | +                                    | +          |
| Hujoel 2003   | ●                                           | +                                       | +                                                         | +                                               | +                                        | +                                    | +          |
| Lee 2014      | +                                           | +                                       | +                                                         | +                                               | +                                        | +                                    | +          |
| Lee 2017      | +                                           | +                                       | +                                                         | +                                               | +                                        | +                                    | +          |
| Mai 2016      | +                                           | +                                       | +                                                         | +                                               | +                                        | +                                    | +          |
| Michaud 2008  | +                                           | +                                       | +                                                         | +                                               | +                                        | +                                    | +          |
| Michaud 2016  | +                                           | +                                       | +                                                         | +                                               | +                                        | +                                    | +          |
| Michaud 2018  | +                                           | +                                       | +                                                         | +                                               | +                                        | +                                    | +          |
| Nwizu 2017    | +                                           | +                                       | +                                                         | +                                               | +                                        | +                                    | +          |

Figure S1. Risk of bias summary: each risk of bias item for each included studies.

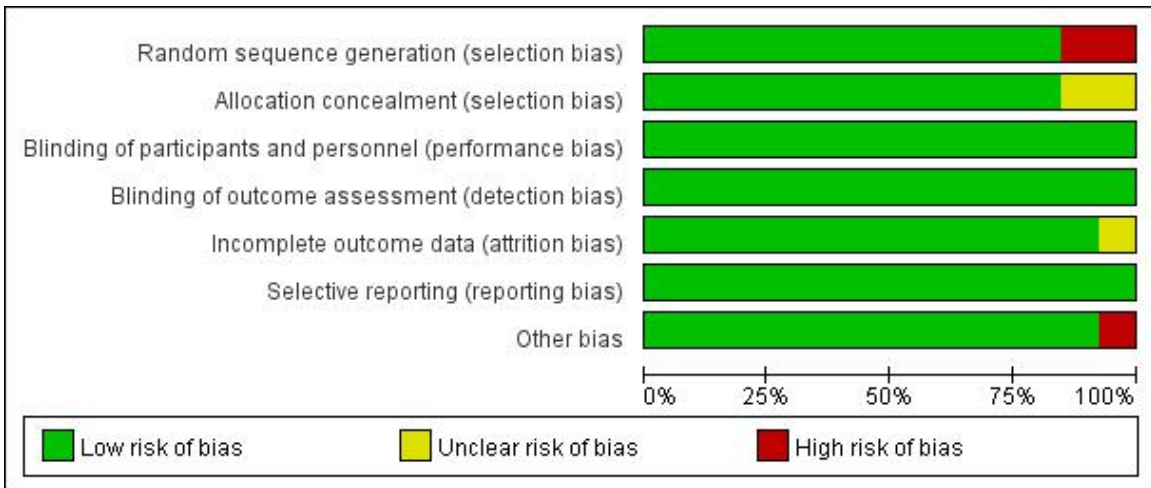

Figure S2. Risk of bias graph: each risk of bias item presented as percentages across all included studies.
